# Supplementary material for: Effect of 1α,25(OH)2 Vitamin D3 in Mutant P53 Glioblastoma Cells: Involvement of Neutral Sphingomyelinase1
Source: PubMed Central journal article supplement (PMC7694157; doi:10.3390/cancers12113163), 2020-10-28
Supplement: cancers-12-03163-s001.pdf [file cancers-12-03163-s001.pdf]

# Supplementary Materials:

## Effect of $1\alpha,25(\text{OH})_2$ Vitamin $\text{D}_3$ in Mutant P53 Glioblastoma Cells: Involvement of Neutral Sphingomyelinase1

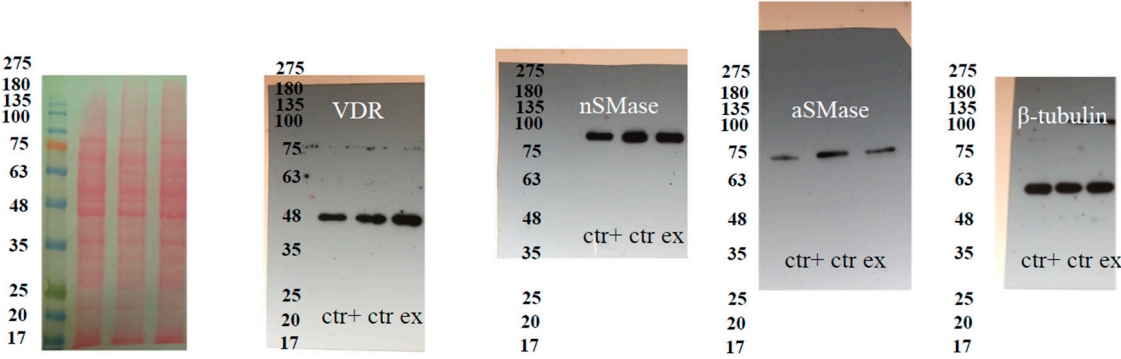

**Figure S1.** Protein expression in GL15 cells treated with 100nM  $1\alpha,25(\text{OH})_2$  Vitamin  $\text{D}_3$   
Ctr+, positive control (HN9.10 cells); ctr, control sample; ex, experimental sample

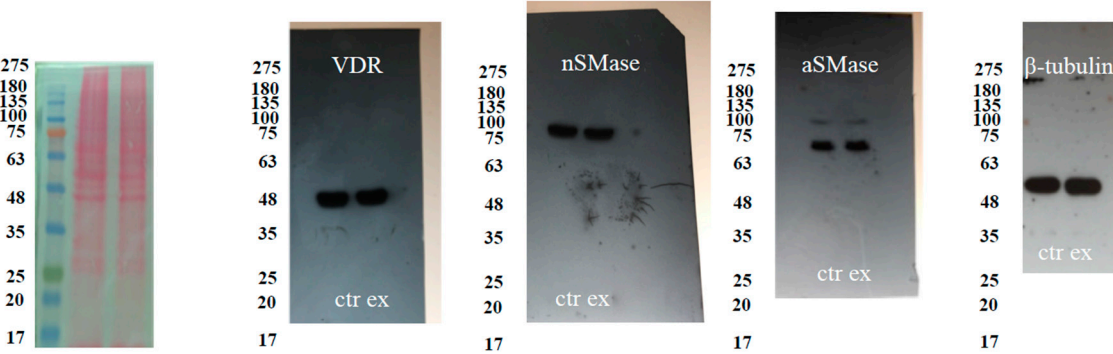

**Figure S2.** Protein expression in GL15 cells treated with 400nM  $1\alpha,25(\text{OH})_2$  Vitamin  $\text{D}_3$   
ctr, control sample; ex, experimental sample

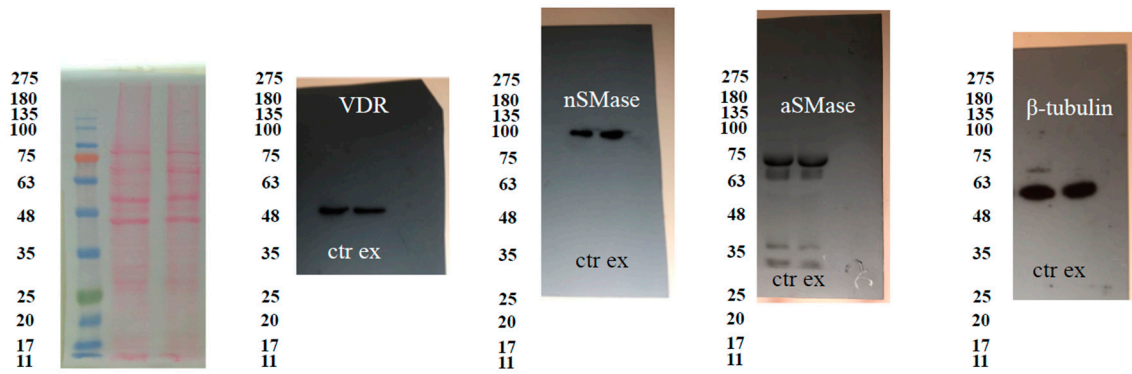

**Figure S3.** Protein expression in U251 cells treated with 100nM  $1\alpha,25(\text{OH})_2$  Vitamin  $\text{D}_3$   
 ctr, control sample; ex, experimental sample

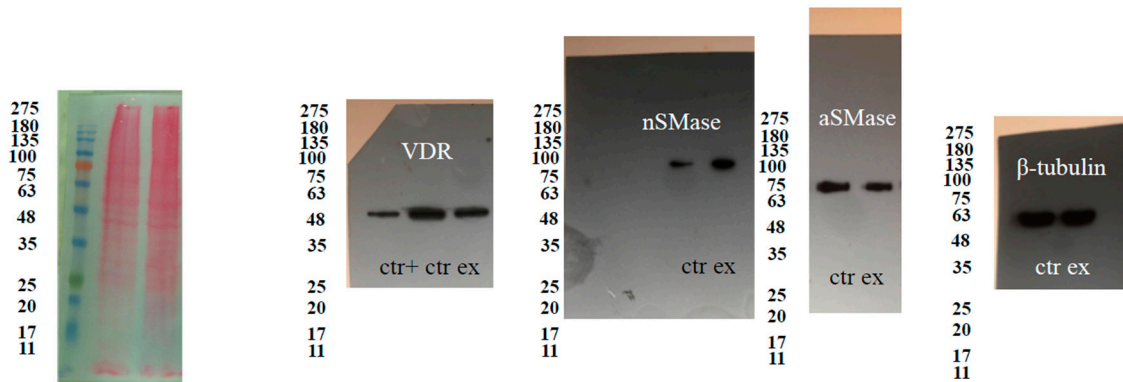

**Figure S4.** Protein expression in U251 cells treated with 400nM  $1\alpha,25(\text{OH})_2$  Vitamin  $\text{D}_3$ .  
 Ctr+, positive control (HN9.10 cells); ctr, control sample; ex, experimental sample

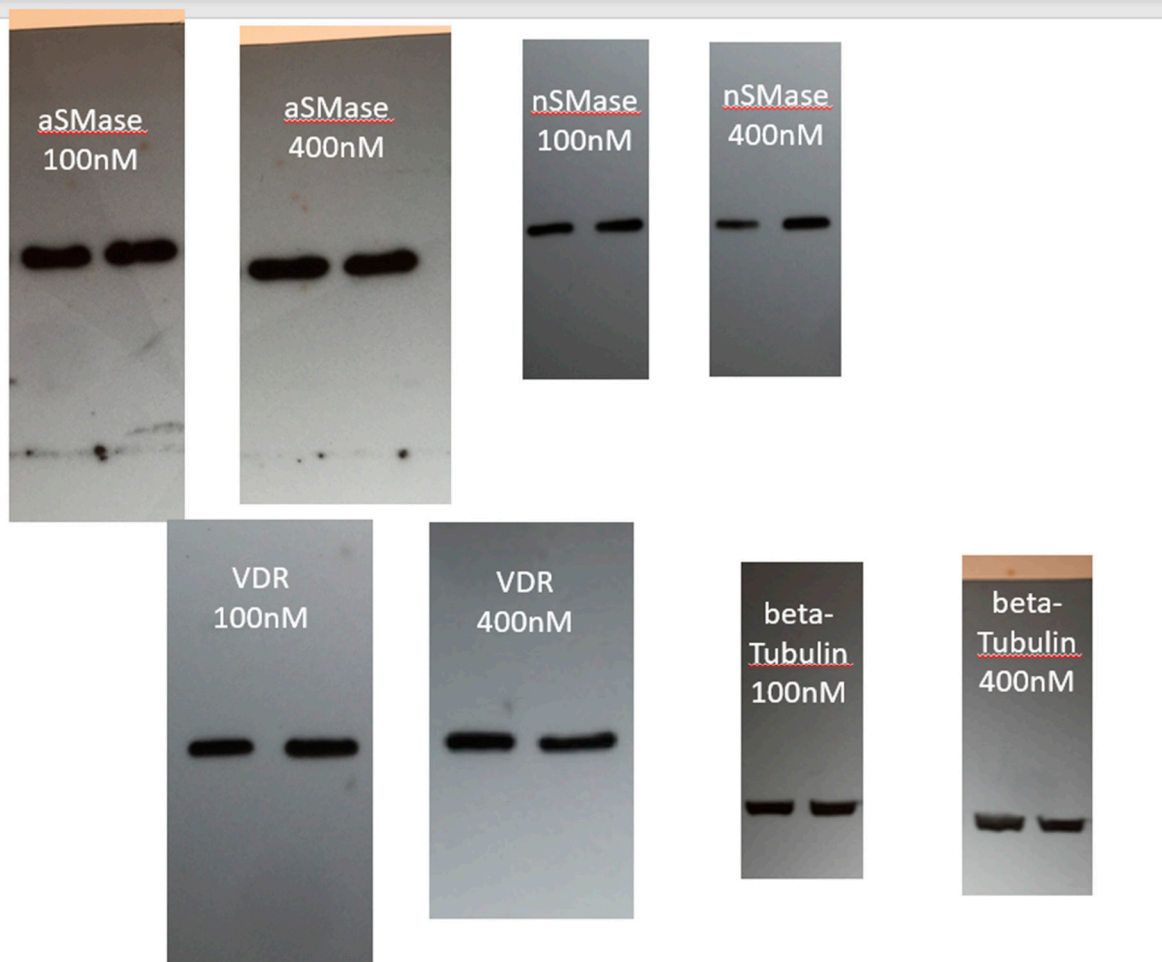

**Figure S5.** Protein expression in LN18 cells treated with 100 and 400nM  $1\alpha,25(\text{OH})_2$  Vitamin  $\text{D}_3$ .  
ctr, control sample; ex, experimental sample
